# Supplementary material for: The utility of DNA metabarcoding for studying the response of arthropod diversity and composition to land-use change in the tropics
Source: PubMed Central journal article supplement (PMC4844954; doi:10.1038/srep24965), 2016-04-26
Supplement: srep24965-s1.pdf [file srep24965-s1.pdf]

## **SUPPORTING INFORMATION**

### **The utility of DNA metabarcoding for studying the response of arthropod diversity and composition to land-use change in the tropics**

Kingsly Chuo Beng<sup>1,2\*</sup>, Kyle W. Tomlinson<sup>1</sup>, Xian Hui Shen<sup>1,2</sup>, Yann Surget-Groba<sup>3,4</sup>, Alice C. Hughes<sup>1</sup>, Richard T. Corlett<sup>1</sup> and J.W. Ferry Slik<sup>5</sup>

<sup>1</sup>Center for Integrative Conservation, Xishuangbanna Tropical Botanical Garden, Chinese Academy of Sciences, Menglun, Mengla, Yunnan, 666303, China.

<sup>2</sup>University of Chinese Academy of Sciences, No.19A Yuquan Road, Beijing 100049, China

<sup>3</sup>Institut des Sciences de la Forêt Tempérée, Université du Québec en Outaouais, 58, Rue Principale, Ripon, Québec J0V 1V0, Canada.

<sup>4</sup>Quebec Centre for Biodiversity Science, McGill University, 1205 Dr. Penfield Avenue, Montreal, Quebec, H3A 1B1, Canada

<sup>5</sup>Faculty of Science, Universiti Brunei Darussalam, Jln. Tungku Link, Gadong, BE1410, Brunei Darussalam.

\*Corresponding author: (email: bengkingsly2000@yahoo.com; Tel: +86-13628810320)

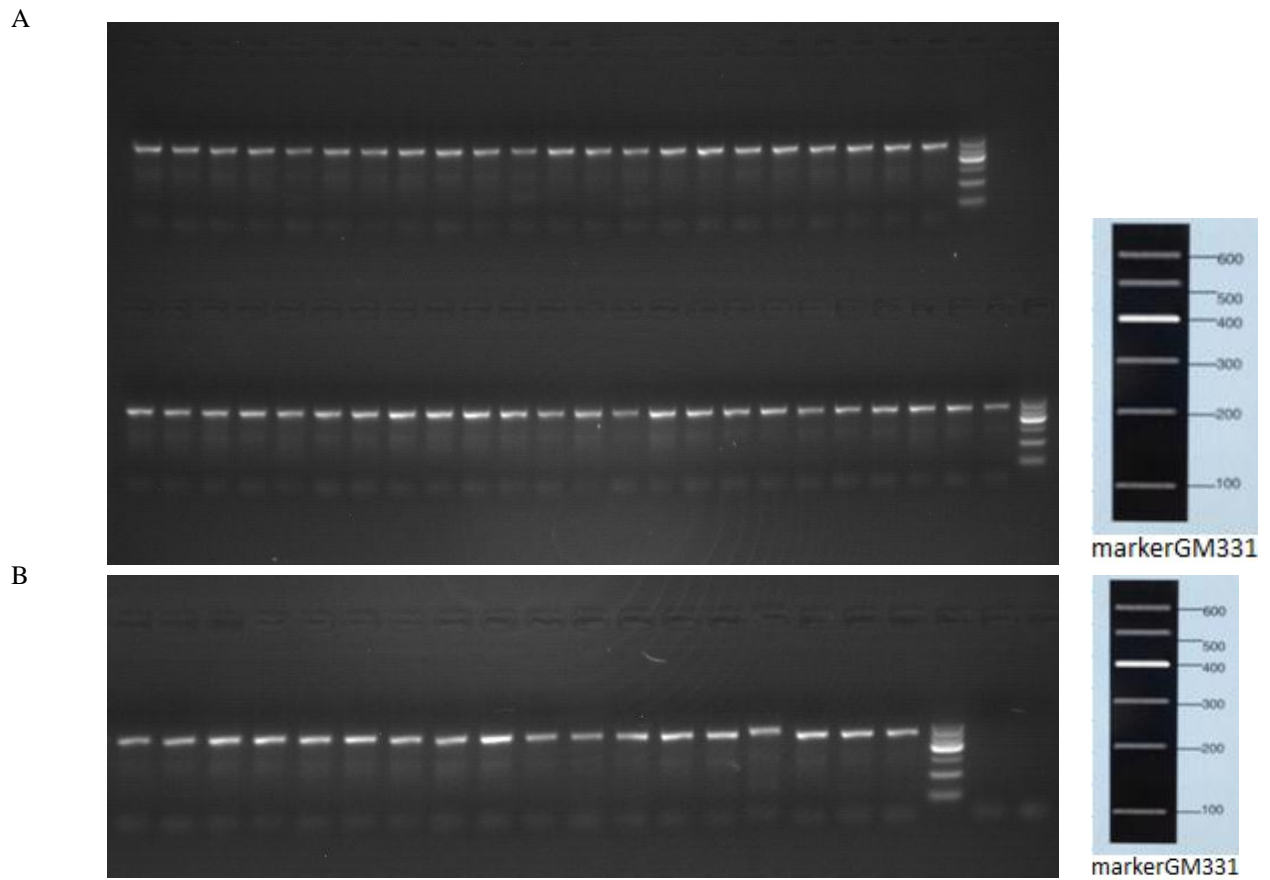

**Fig S1** Gel electrophoresis for (A): Bulk arthropod samples and (B): Individual arthropod samples (from right to left; Hymenoptera sp1 & sp2, Araneae sp1 & sp2, Blattodea sp1 & sp2, Mantodea sp1 & sp2, Coleoptera sp1 & sp2, Chilopoda sp1 and sp2, Orthoptera sp1 & sp2, Hemiptera sp1 & sp2, Lepidoptera sp1 & sp2).

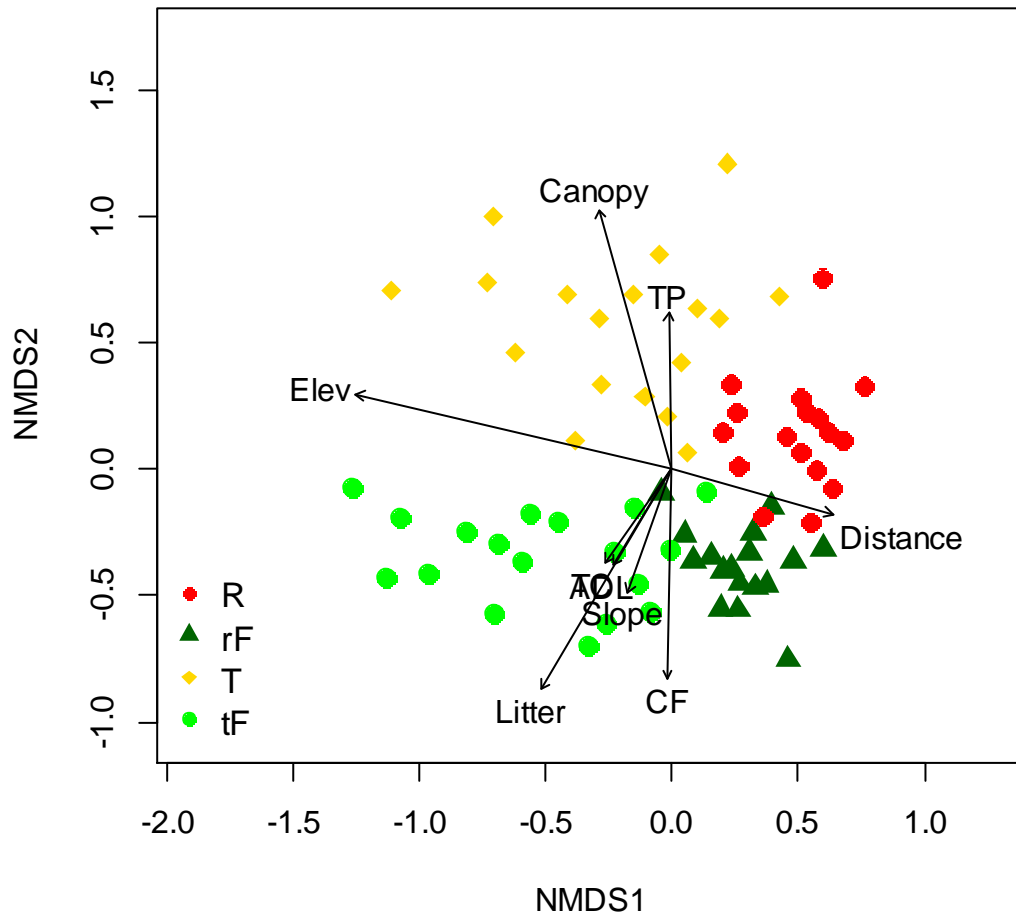

**Figure S2** Ordination (nMDS) plot illustrating the similarities and differences in MOTU composition across four land-use types and the effects of environmental variables. The variables were fitted to the ordination plot using 1000 permutations. Elev = elevation, Canopy = canopy cover, TP = total Phosphorus, TC = total Carbon, ADL = lignin, Litter = leaf litter thickness, CF = coarse fiber, Distance= horizontal distance between forest-plantation pairs

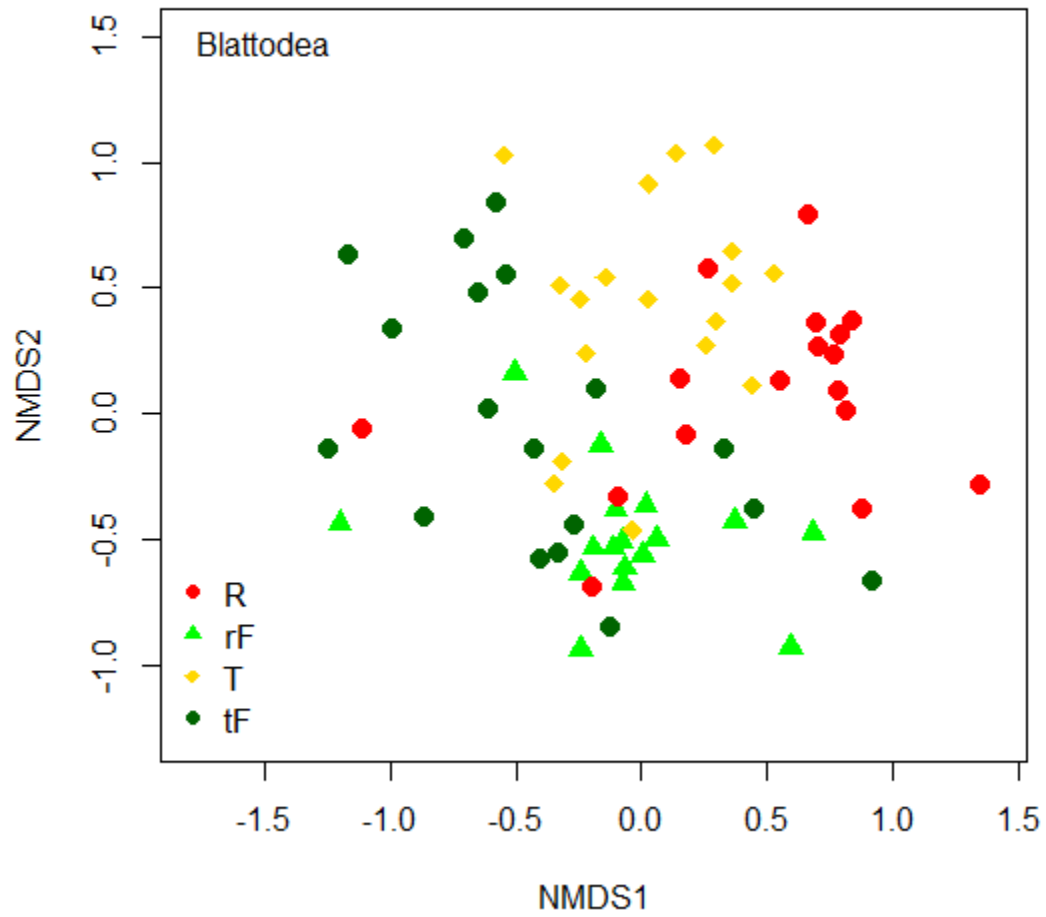

**Figure S3** Ordination (nMDS) plots illustrating the similarities and differences in MOTU composition from the two matched forest-plantation pairs

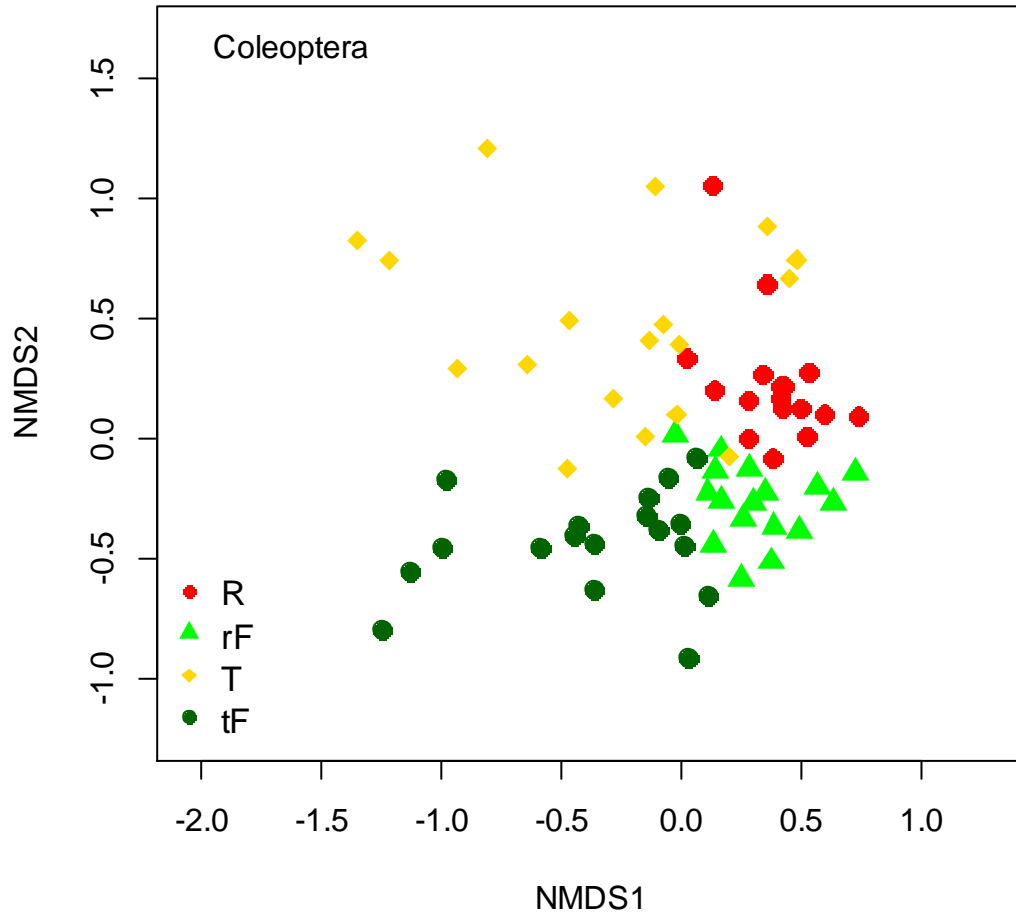

**Figure S4** Ordination (nMDS) plots illustrating the similarities and differences in MOTU composition from the two matched forest-plantation pairs

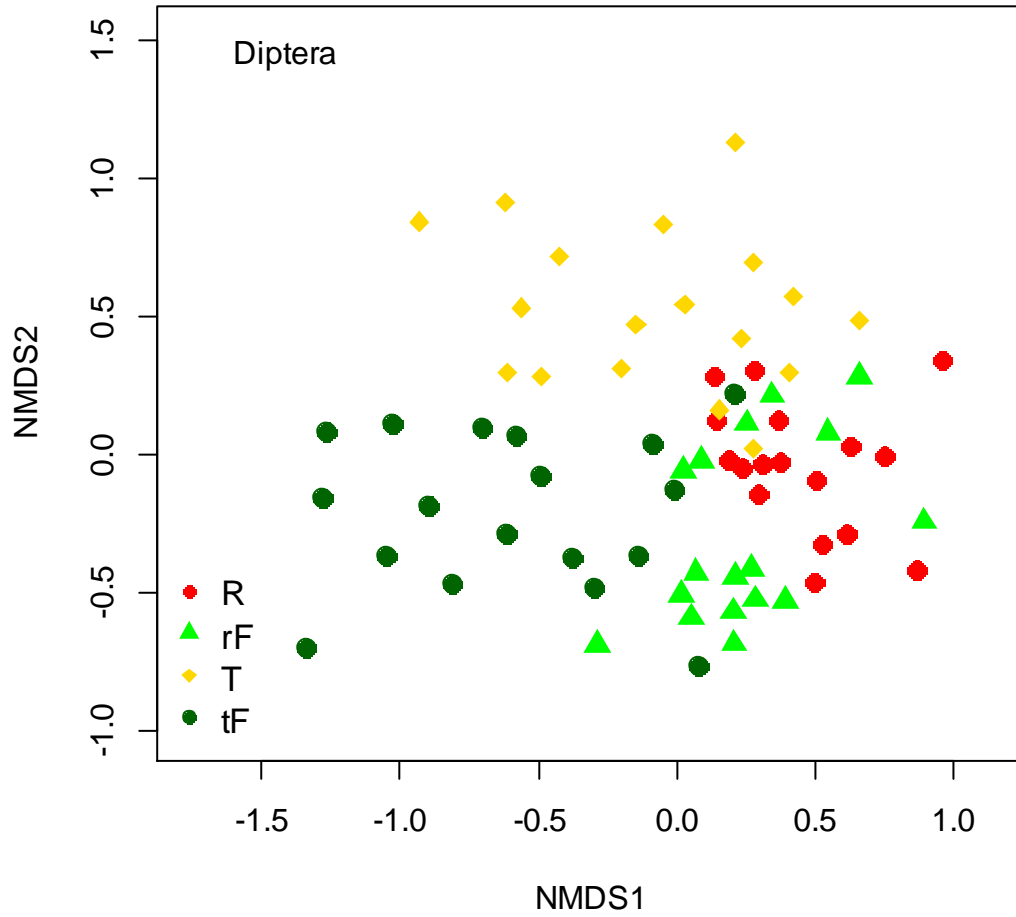

**Figure S5** Ordination (nMDS) plots illustrating the similarities and differences in MOTU composition from the two matched forest-plantation pairs

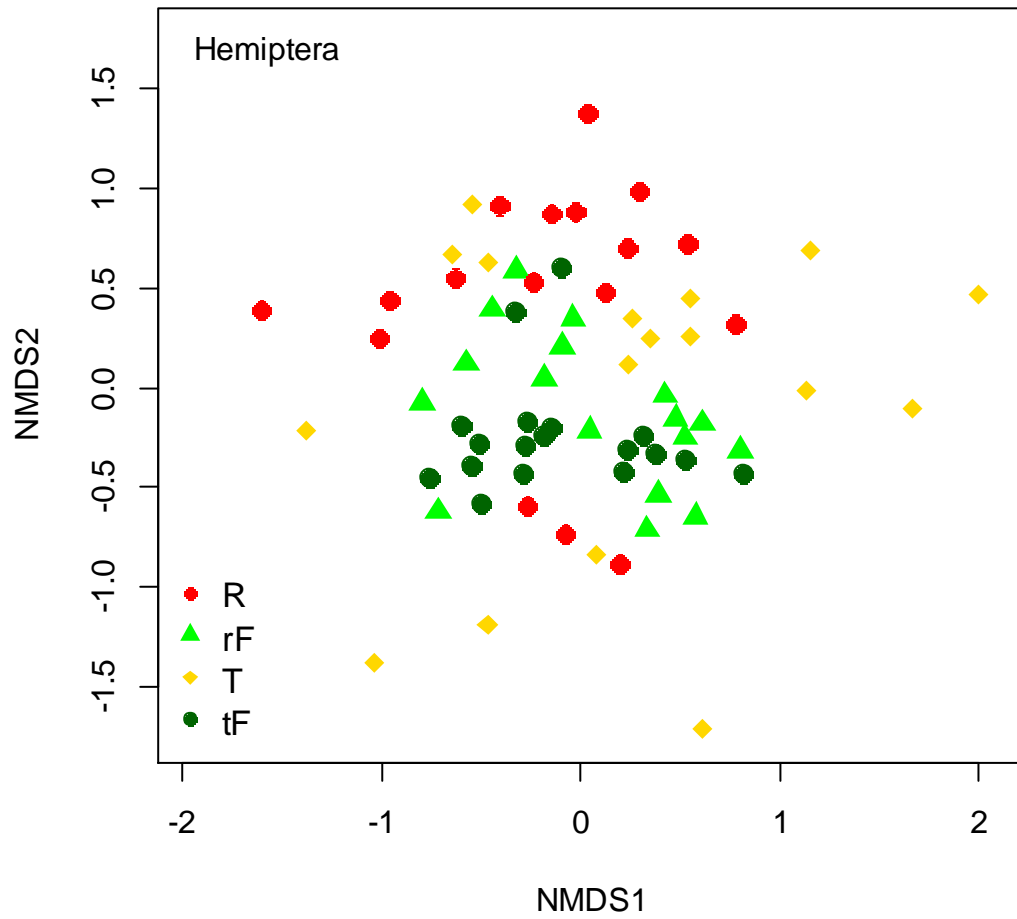

**Figure S6** Ordination (nMDS) plots illustrating the similarities and differences in MOTU composition from the two matched forest-plantation pairs

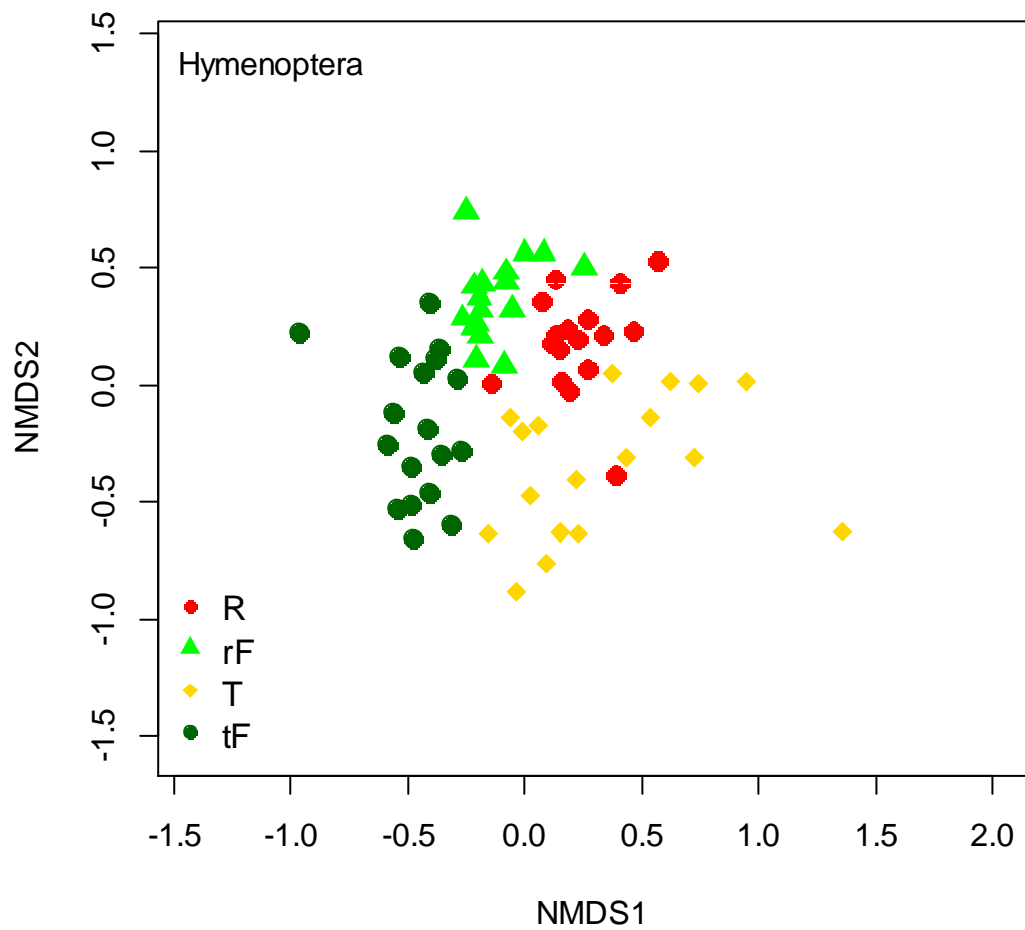

**Figure S7** Ordination (nMDS) plots illustrating the similarities and differences in MOTU composition from the two matched forest-plantation pairs



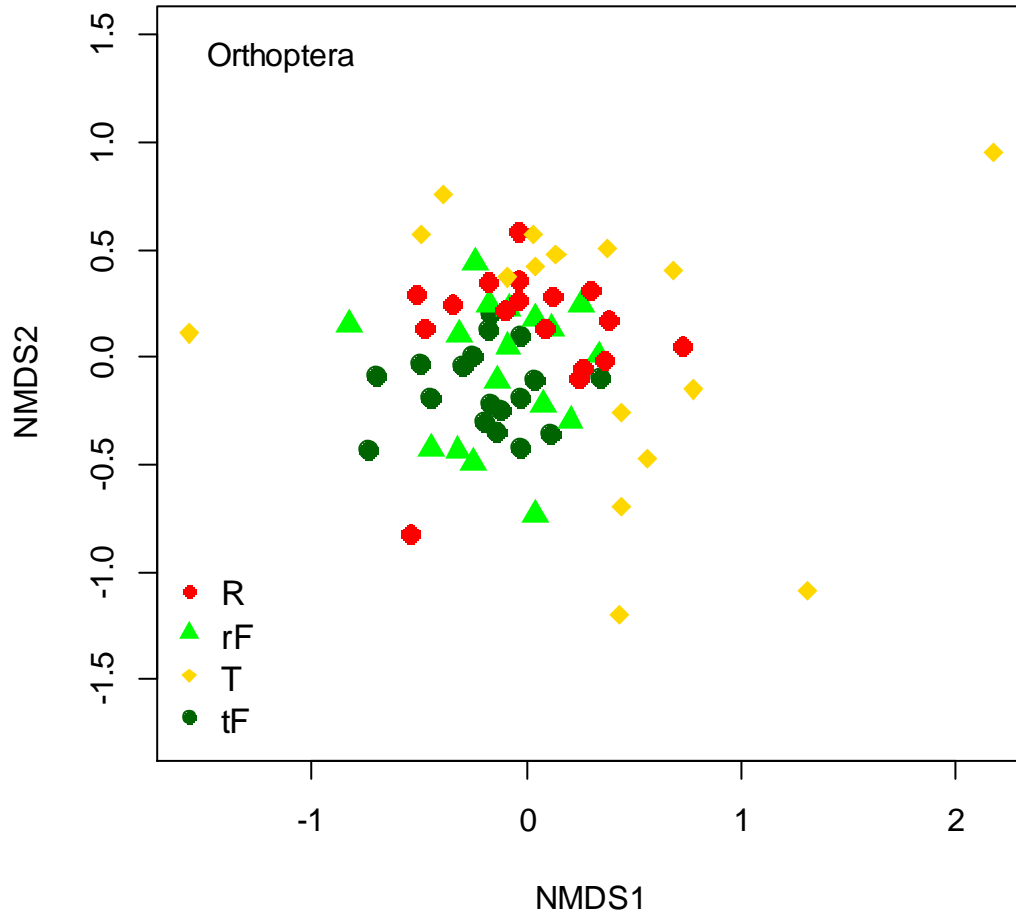

**Figure S8** Ordination (nMDS) plots illustrating the similarities and differences in MOTU composition from the two matched forest-plantation pairs

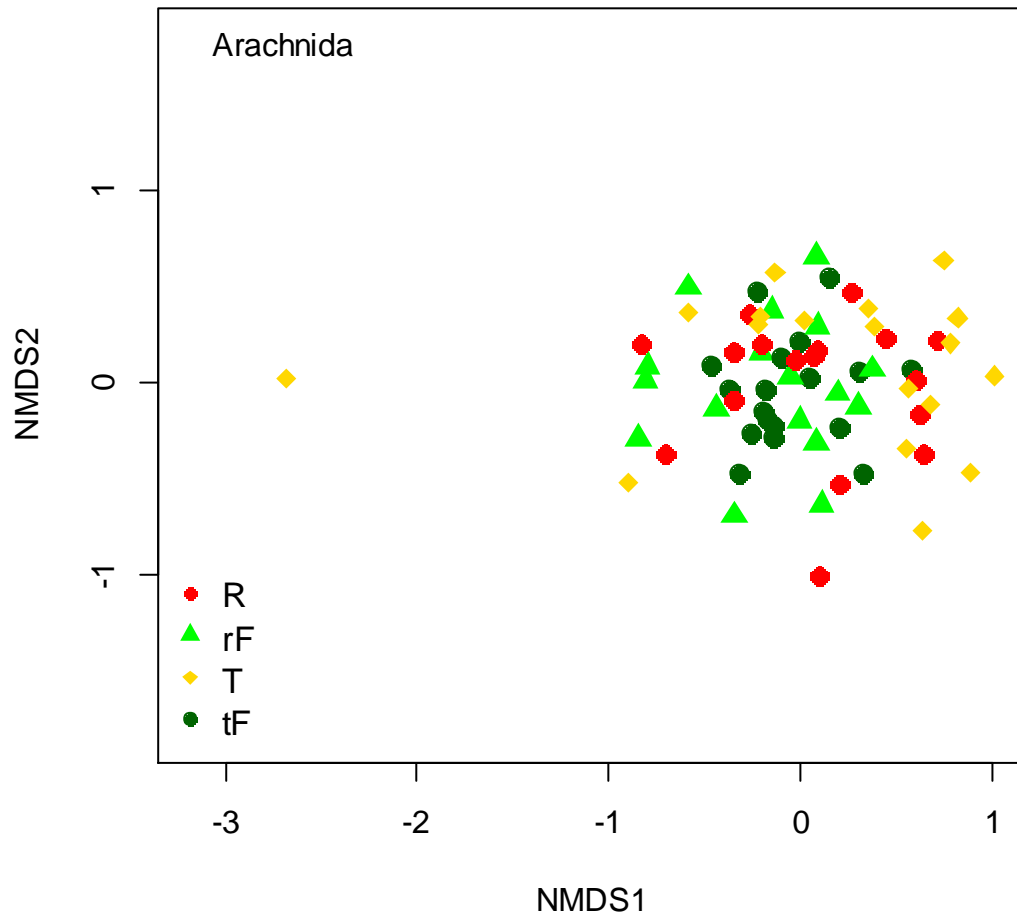

**Figure S9** Ordination (nMDS) plots illustrating the similarities and differences in MOTU composition from the two matched forest-plantation pairs

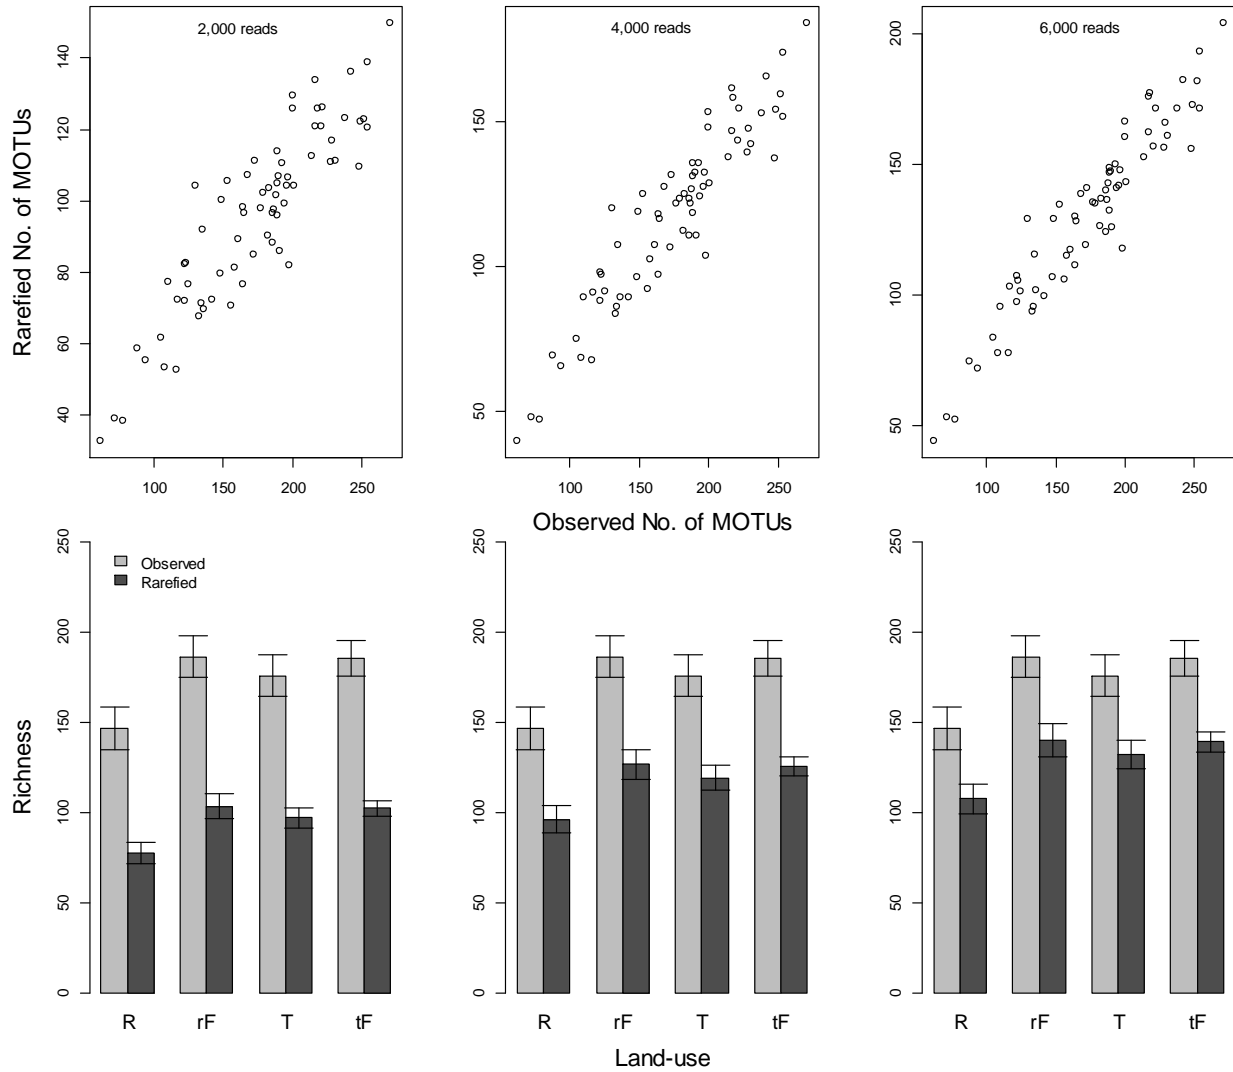

**Figure S10** Relationship between observed and rarefied MOTU richness. Rarefaction was performed by randomly drawing 2,000; 4,000; and 6,000 reads (upper graphs) from each of the 70 sampled sites.

# Plot layout for arthropod sampling

## Crossed-transect design

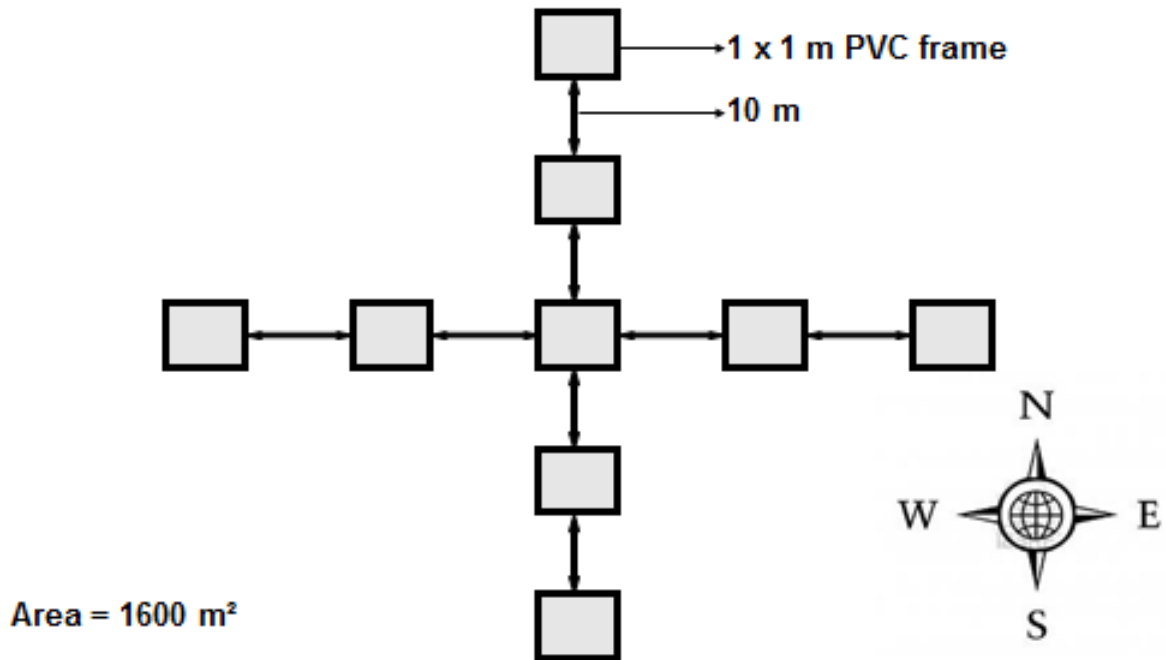

**Figure S11** Arthropod sampling plot design. Drawing was made using Microsoft PowerPoint 2010.

**Table S1** Community composition of the 37 reference sequences used to simulate six mock communities

| Order         | Family         | Species                               |
|---------------|----------------|---------------------------------------|
| Hemiptera     | Achilidae      | <i>Magadha taibaishanensis</i>        |
| Lepidoptera   | Sphingidae     | <i>Hyles_annei</i>                    |
| Decapoda      | Lithodidae     | <i>Paralithodes_camtschaticus</i>     |
| Orthoptera    | Gryllidae      | <i>Gryllus sp.</i>                    |
| Lepidoptera   | Lycaenidae     | <i>Lachnocnema sp.</i>                |
| Diptera       | Culicinae      | <i>Borichinda cavernicola</i>         |
| Lepidoptera   | Castniidae     | <i>Telchin licus</i>                  |
| Arachnida     | Ixodidae       | <i>Dermacentor reticulatus</i>        |
| Lepidoptera   | Lycaenidae     | <i>Wagimo signata</i>                 |
| Diptera       | Culicinae      | <i>Culiseta longiareolata</i>         |
| Lepidoptera   | Nymphalidae    | <i>Melitaea didyma</i>                |
| Pantopoda     | Colossendeidae | <i>Colossendeis macerrima</i>         |
| Lepidoptera   | Nymphalidae    | <i>Mycalesis janardana</i>            |
| Diptera       | Agromyzidae    | <i>Ophiomyia nasuta</i>               |
| Diptera       | Simuliidae     | <i>Simulium balcanicum</i>            |
| Diptera       | Psychodidae    | <i>Lutzomyia (Helcocyrtomyia) sp.</i> |
| Diptera       | Drosophilidae  | <i>Leucophenga angusta</i>            |
| Lepidoptera   | Nymphalidae    | <i>Eunica viola</i>                   |
| Lepidoptera   | Cryptophasidae | <i>Opisina arenosella</i>             |
| Lepidoptera   | Nymphalidae    | <i>Nessaea obrinus</i>                |
| Hemiptera     | Anthocoridae   | <i>Anthocoris expansus</i>            |
| Ixodida       | Ixodidae       | <i>Rhipicephalus pumilio</i>          |
| Hemiptera     | Cercopidae     | <i>Locris rubra</i>                   |
| Ephemeroptera | Heptageniidae  | <i>Epeorus vitreus</i>                |

|             |               |                                           |
|-------------|---------------|-------------------------------------------|
| Coleoptera  | Lampyridae    | <i>Pyractomena borealis</i>               |
| Orthoptera  | Acrididae     | <i>Prumna mandshurica</i>                 |
| Mantodea    | Mantidae      | <i>Elmantis nira</i>                      |
| Lepidoptera | Nymphalidae   | <i>Eresia Letitia</i>                     |
| Orthoptera  | Acrididae     | <i>Aerochoreutes carlinianus</i>          |
| Hemiptera   | Lygaeidae     | <i>Spilostethus pandurus</i>              |
| Diptera     | Drosophilidae | <i>Drosophila melanogaster</i>            |
| Diptera     | Culicidae     | <i>Uranotaenia macfarlanei</i>            |
| Hymenoptera | Mymaridae     | <i>Anagrus ustulatus</i>                  |
| Ixodida     | Ixodidae      | <i>Rhipicephalus<br/>haemaphysaloides</i> |
| Coleoptera  | Carabidae     | <i>Trechus uhagoni</i>                    |
| Diptera     | Culicidae     | <i>Borichinda cavernicola</i>             |
| Hymenoptera | Vespidae      | <i>Polybia sericea</i>                    |

**Table S2** Validated mock community sequences showing the category (Classification), percent identity between the query sequence and the top hit in the reference database (Top hit), percent identity between the query sequence and the maximum parsimony model (MPM) and matched species in reference database. **Perfect:** 100% match to a reference sequence. Size gives the number of reads assigned to each OTU. Results are for one mock community (6).

| OTU            | Classification | Top hit | MPM | Matched species(s) in reference database   |
|----------------|----------------|---------|-----|--------------------------------------------|
| OTU_9;size=59  | perfect        | 100     | 100 | GBCL2738-07 Pyractomena                    |
| OTU_8;size=59  | perfect        | 100     | 100 | MDA578-08 Epeorus                          |
| OTU_2;size=178 | perfect        | 100     | 100 | GBCMD13542-13 Paralithodes                 |
| OTU_5;size=79  | perfect        | 100     | 100 | JQ737085.1;Rhipicephalus_haemaphysaloides; |
| OTU_7;size=60  | perfect        | 100     | 100 | GBMIN17748-13 Leucophenga                  |
| OTU_6;size=90  | perfect        | 100     | 100 | GBMOR766-13 Gryllus COI-5P JX436481        |
| OTU_10;size=62 | perfect        | 100     | 100 | GBMH5085-08 Aerochoreutes                  |
| OTU_11;size=59 | perfect        | 100     | 100 | GBMH8038-10 Elmantis                       |
| OTU_4;size=176 | perfect        | 100     | 100 | AJ749430.1;Hyles_annei;                    |
| OTU_12;size=49 | perfect        | 100     | 100 | GBMIN22936-13 Anthocoris                   |
| OTU_3;size=141 | perfect        | 100     | 100 | EF370413.1;Borichinda_cavernicola;         |
| OTU_15;size=50 | perfect        | 100     | 100 | KF894745.1;Magadha_taibaishanensis;        |
| OTU_14;size=57 | perfect        | 100     | 100 | ANGEN047-14 Tropidothorax COI-5P           |
| OTU_1;size=234 | perfect        | 100     | 100 | HM193878.1;Rhipicephalus_pumilio;          |
| OTU_13;size=78 | perfect        | 100     | 100 | KC921257.1;Lutzomyia_(Helcocyrtomyia);     |
| OTU_16;size=60 | perfect        | 100     | 100 | HM193885.1;Dermacentor_reticulatus;        |
| OTU_17;size=46 | perfect        | 100     | 100 | GBDP3916-07 Ophiomyia                      |
| OTU_18;size=70 | perfect        | 100     | 100 | GBMIN14844-13 Telchin                      |
| OTU_20;size=73 | perfect        | 100     | 100 | FJ531676.1;Prumna_mandshurica;             |
| OTU_23;size=54 | perfect        | 100     | 100 | GBLN1858-09 Melitaea                       |
| OTU_25;size=43 | perfect        | 100     | 100 | GBCL14999-13 Trechus                       |
| OTU_22;size=35 | perfect        | 100     | 100 | GBDPD294-14 Drosophila                     |
| OTU_19;size=42 | perfect        | 100     | 100 | JQ728133.1;Uranotaenia_macfarlanei;        |
| OTU_26;size=46 | perfect        | 100     | 100 | GBGL19546-15 Lachnocnema                   |
| OTU_24;size=44 | perfect        | 100     | 100 | GBDCU607-12 Culiseta                       |
| OTU_21;size=39 | perfect        | 100     | 100 | GBA20055-14 Colossendeis                   |
| OTU_27;size=37 | perfect        | 100     | 100 | GBMIN10292-12 Locris                       |
| OTU_28;size=51 | perfect        | 100     | 100 | GBLN0423-06 Eresia                         |
| OTU_34;size=14 | perfect        | 100     | 100 | GBMIN10748-12 Anagrus                      |
| OTU_29;size=33 | perfect        | 100     | 100 | GBMIN37947-13 Wagimo                       |
| OTU_30;size=55 | perfect        | 100     | 100 | JN900474.1;Opisina_arenosella;             |
| OTU_31;size=30 | perfect        | 100     | 100 | GBMIN20229-13 Simulium                     |
| OTU_32;size=34 | perfect        | 100     | 100 | GBLN2848-10 Eunica                         |
| OTU_35;size=16 | perfect        | 100     | 100 | GBMIN37842-13 Mycalesis                    |
| OTU_37;size=22 | perfect        | 100     | 100 | KC921295.1;Lutzomyia_(Helcocyrtomyia);     |
| OTU_36;size=37 | perfect        | 100     | 100 | GBLN2818-10 Nessaea                        |

|                |         |     |     |                     |
|----------------|---------|-----|-----|---------------------|
| OTU_33;size=12 | perfect | 100 | 100 | GBAH1587-06 Polybia |
|----------------|---------|-----|-----|---------------------|



**Table S3** The number of quality filtered reads and their mean fragment length across 70 sample sites.

| Habitat | Landuse | Latitude  | Longitude  | Barcode | No. filtered reads | Mean read length |
|---------|---------|-----------|------------|---------|--------------------|------------------|
| tF01    | Forest  | 22.385212 | 100.958524 | GCATCGT | 47,726             | 398.3            |
| tF02    | Forest  | 22.209488 | 101.315989 | CACTCTA | 15,342             | 397.7            |
| tF03    | Forest  | 22.085498 | 101.192795 | CTGAGAC | 14,965             | 396              |
| tF04    | Forest  | 22.102885 | 101.342195 | TCATCTG | 46,799             | 395.5            |
| tF05    | Forest  | 22.151386 | 101.45907  | GCGTGTG | 48,335             | 395.6            |
| tF06    | Forest  | 21.992465 | 101.10544  | GTGCGAT | 41,972             | 397.5            |
| tF07    | Forest  | 22.239103 | 100.394079 | GCTAGCA | 48,835             | 398.9            |
| tF08    | Forest  | 22.098249 | 100.547548 | TACTAGT | 51,139             | 398.4            |
| tF09    | Forest  | 21.901733 | 100.541062 | ATATGTA | 32,773             | 399.9            |
| tF10    | Forest  | 21.834458 | 100.539369 | ATGTGTG | 33,745             | 398.1            |
| tF11    | Forest  | 21.584436 | 100.426162 | CATGTCG | 41,985             | 399.2            |
| rF12    | Forest  | 21.223269 | 101.690125 | TCGTATG | 45,117             | 388.6            |
| tF13    | Forest  | 21.904397 | 100.146904 | AGCTCAT | 41,167             | 398.6            |
| tF14    | Forest  | 21.945943 | 100.129664 | AGAGACA | 51,631             | 399.1            |
| tF15    | Forest  | 22.224714 | 101.34951  | AGTCGCG | 24,685             | 398.6            |
| rF16    | Forest  | 21.697214 | 101.278743 | GACTGTC | 21,958             | 398              |
| rF17    | Forest  | 21.97157  | 101.274464 | GAGCATA | 49,319             | 348              |
| rF18    | Forest  | 21.883692 | 101.295208 | TGTGTCA | 49,097             | 391.1            |
| rF19    | Forest  | 21.499948 | 101.53474  | GCATCGT | 50,964             | 398.5            |
| rF20    | Forest  | 22.158267 | 100.783992 | ATATGTA | 37,225             | 396.7            |
| rF21    | Forest  | 22.159294 | 100.945697 | GCGTCGC | 39,001             | 397.1            |
| rF22    | Forest  | 22.015584 | 100.97392  | AGTGCTG | 36,063             | 357.6            |
| rF23    | Forest  | 21.912049 | 101.134264 | ACTCGCT | 24,744             | 399.5            |
| rF24    | Forest  | 21.846596 | 101.379262 | GCGTGTG | 46,400             | 396.9            |
| rF25    | Forest  | 21.909728 | 100.740862 | TACTAGT | 30,862             | 399.6            |
| rF26    | Forest  | 22.154768 | 100.672528 | ATGTGTG | 21,099             | 397.6            |
| rF27    | Forest  | 21.674871 | 100.722957 | GTCTGAC | 44,819             | 398.7            |
| tF28    | Forest  | 21.970419 | 101.479784 | GCTAGCA | 34,618             | 397.3            |
| tF29    | Forest  | 22.029231 | 100.618368 | TCATCTG | 38,203             | 396.6            |
| tF30    | Forest  | 22.525476 | 101.103012 | GTGCGAT | 33,628             | 398.7            |
| rF31    | Forest  | 21.953084 | 101.257076 | GATATGA | 42,602             | 397.8            |
| rF32    | Forest  | 21.919592 | 101.239585 | TGTGTAT | 40,802             | 399              |
| rF33    | Forest  | 21.948294 | 101.298306 | CACTCTA | 35,837             | 396.3            |
| rF34    | Forest  | 21.916449 | 101.21363  | CTGAGAC | 37,124             | 390.1            |
| rF35    | Forest  | 21.917029 | 101.271519 | ATCTAGT | 38,267             | 398.2            |
| R12     | Rubber  | 21.225437 | 101.693636 | ATAGTGA | 25,719             | 391              |
| R16     | Rubber  | 21.698906 | 101.278556 | CACAGCA | 37,585             | 396.1            |

|     |        |           |            |         |        |       |
|-----|--------|-----------|------------|---------|--------|-------|
| R17 | Rubber | 21.97108  | 101.270274 | TGCGTAG | 39,051 | 364.1 |
| R18 | Rubber | 21.884041 | 101.294311 | GTACATA | 30,432 | 360.6 |
| R19 | Rubber | 21.499337 | 101.535627 | GTGCTCG | 17,808 | 397.3 |
| R20 | Rubber | 22.158707 | 100.785414 | GTGTCTG | 23,766 | 390.8 |
| R21 | Rubber | 22.160814 | 100.946758 | TCACATC | 34,553 | 398.6 |
| R23 | Rubber | 21.916058 | 101.134858 | CTCAGAT | 36,687 | 396.2 |
| R24 | Rubber | 21.84609  | 101.380471 | GATATCG | 22,918 | 396.7 |
| R25 | Rubber | 21.910717 | 100.740436 | GTATAGT | 27,902 | 395.1 |
| R26 | Rubber | 22.154524 | 100.669341 | ACATATA | 19,278 | 399.8 |
| R27 | Rubber | 21.67275  | 100.723944 | AGAGACA | 50,181 | 400   |
| R31 | Rubber | 21.953313 | 101.253649 | TGTGTAT | 28,856 | 398.6 |
| R32 | Rubber | 21.920514 | 101.240265 | TGTGTCA | 44,193 | 382.8 |
| R33 | Rubber | 21.945426 | 101.302209 | GACTGTC | 40,151 | 396.9 |
| R34 | Rubber | 21.920158 | 101.214222 | GATATCG | 31,662 | 396.2 |
| R35 | Rubber | 21.910556 | 101.272179 | GTGTCTG | 34,105 | 358.1 |
| T01 | Tea    | 22.386482 | 100.957753 | CATGTCG | 24,745 | 369.5 |
| T02 | Tea    | 22.212192 | 101.313751 | AGTGCTG | 29,955 | 388.8 |
| T03 | Tea    | 22.087136 | 101.194285 | AGTCGCG | 40,065 | 392   |
| T04 | Tea    | 22.103814 | 101.341934 | ATCTAGT | 23,435 | 393.9 |
| T05 | Tea    | 22.152392 | 101.460156 | TCACATC | 52,723 | 395.6 |
| T06 | Tea    | 21.992713 | 101.103068 | AGCTCAT | 30,112 | 397.8 |
| T07 | Tea    | 22.239333 | 100.392942 | ATAGTGA | 49,322 | 395.1 |
| T08 | Tea    | 22.098209 | 100.548005 | CTCAGAT | 51,937 | 397.9 |
| T09 | Tea    | 21.900615 | 100.541164 | TGCGTAG | 24,821 | 398.8 |
| T10 | Tea    | 21.835022 | 100.53975  | TCGTATG | 25,383 | 398.4 |
| T11 | Tea    | 21.586601 | 100.425055 | GTATAGT | 51,649 | 397.8 |
| T13 | Tea    | 21.904553 | 100.147851 | GAGCATA | 46,277 | 363.1 |
| T14 | Tea    | 21.944589 | 100.12863  | ACATATA | 54,438 | 396.4 |
| T15 | Tea    | 22.223876 | 101.3495   | GTACATA | 44,649 | 388.8 |
| T22 | Tea    | 22.014433 | 100.973694 | GCGTCGC | 43,431 | 330   |
| T28 | Tea    | 21.969301 | 101.478696 | ACTCGCT | 39,951 | 359.5 |
| T29 | Tea    | 22.027712 | 100.618467 | GTGCTCG | 29,883 | 396.7 |
| T30 | Tea    | 22.524253 | 101.102906 | CACAGCA | 27,008 | 373.7 |

**Table S4** Comparison between two taxonomic assignment algorithms (UTAX and USEARCH) for MOTUs assigned to arthropod order Hymenoptera. Out of the 261 MOTUs assigned by UTAX, 253 were also assigned by USEARCH (97% correspondence). Taxonomic assignment for eight OTUs (marked in bold and asterisks) was different for both algorithms.

| OTU_ID                    | UTAX                     | USEARCH                                           |             |
|---------------------------|--------------------------|---------------------------------------------------|-------------|
|                           | Order (Confidence value) | Reference database top hit                        | Identity    |
| OTU_1001;size=19;         | Hymenoptera(99.5)        | GMSUE180-14 Hymenoptera COI-5P                    | 98.3        |
| OTU_1008;size=19;         | Hymenoptera(53.9)        | BBFOA107-10 Formicidae COI-5P HQ928626            | 85.1        |
| OTU_1017;size=41;         | Hymenoptera(99.6)        | ASANQ180-09 Formicidae COI-5P GU710912            | 99.5        |
| OTU_1019;size=28;         | Hymenoptera(57.9)        | GMMGN787-14 Hymenoptera COI-5P                    | 97.1        |
| OTU_1033;size=29;         | Hymenoptera(92.1)        | ASANZ486-10 Formicidae COI-5P HQ547736            | 90.1        |
| OTU_1046;size=35;         | Hymenoptera(40.8)        | ASANR616-09 Monomorium                            | 82          |
| OTU_1067;size=19;         | Hymenoptera(65.7)        | CNGRL255-13 Encyrtidae COI-5P KR789888            | 87.9        |
| OTU_1074;size=24;         | Hymenoptera(75.1)        | ASANA614-06 Hymenoptera COI-5P                    | 87.8        |
| OTU_109;size=1263;        | Hymenoptera(43.2)        | GMBGC389-15 Hymenoptera COI-5P                    | 97.9        |
| OTU_1090;size=16;         | Hymenoptera(61.8)        | ASPNA1724-11 Formicidae COI-5P                    | 91.6        |
| OTU_1095;size=16;         | Hymenoptera(63.7)        | MAHYM766-12 Hymenoptera COI-5P                    | 89.3        |
| OTU_1098;size=18;         | Hymenoptera(33.3)        | ASANA553-06 Hymenoptera COI-5P                    | 81.9        |
| OTU_1109;size=18;         | Hymenoptera(40.8)        | ASPNA1409-10 Formicidae COI-5P HQ551086           | 86.6        |
| OTU_1117;size=24;         | Hymenoptera(99.5)        | GBMIN19810-13 Prenolepis                          | 98.3        |
| OTU_1118;size=36;         | Hymenoptera(33.3)        | ASBEZ463-11 Formicidae COI-5P                     | 79.2        |
| OTU_1121;size=26;         | Hymenoptera(99.8)        | WOMIC091-10 Neoclarkinella COI-5P JN282227        | 99.8        |
| OTU_1126;size=19;         | Hymenoptera(94.8)        | GMMGC015-14 Hymenoptera COI-5P                    | 95.5        |
| OTU_1134;size=17;         | Hymenoptera(43.2)        | ASAZT049-11 Formicidae COI-5P                     | 84.1        |
| OTU_1149;size=17;         | Hymenoptera(49.8)        | ACGAG525-11 Pyramica                              | 82.9        |
| OTU_1151;size=15;         | Hymenoptera(70.2)        | BBHYA3292-12 Hymenoptera COI-5P                   | 86.4        |
| OTU_1163;size=57;         | Hymenoptera(80.6)        | ASPAL025-09 Hymenoptera COI-5P                    | 90.8        |
| OTU_1199;size=16;         | Hymenoptera(70.2)        | GBMIN30395-13 Empria                              | 77.9        |
| OTU_1223;size=29;         | Hymenoptera(53.9)        | ASANP367-09 Formicidae COI-5P GU710267            | 82.6        |
| OTU_1255;size=21;         | Hymenoptera(63.7)        | ASANA239-06 Hymenoptera COI-5P KF605021           | 83.9        |
| OTU_1283;size=12;         | Hymenoptera(61.8)        | GBMIN25819-13 Hymenoptera COI-5P JQ344538         | 98.1        |
| OTU_1288;size=12;         | Hymenoptera(98.0)        | CNGBO738-14 Baryscapus COI-5P KR405478            | 92.5        |
| OTU_1307;size=33;         | Hymenoptera(98.6)        | MGABB398-10 Formicidae COI-5P HM893002            | 92.3        |
| OTU_1326;size=12;         | Hymenoptera(99.3)        | GBAHF101-13 Polyrhachis                           | 94.8        |
| OTU_1331;size=14;         | Hymenoptera(60.0)        | ASAND755-10 Formicidae COI-5P JN283071            | 85.1        |
| OTU_1360;size=15;         | Hymenoptera(23.9)        | ASBEZ373-10 Formicidae COI-5P HQ548139            | 80.9        |
| OTU_138;size=1452;        | Hymenoptera(67.8)        | GBMIN25144-13 Hymenoptera COI-5P JQ345027         | 91.6        |
| <b>OTU_1393;size=15;*</b> | <b>Hymenoptera(40.8)</b> | <b>WMGSI354-10 Trombidiformes COI-5P HQ584522</b> | <b>77.4</b> |
| OTU_1395;size=10;         | Hymenoptera(77.9)        | ASPNA2359-11 Hymenoptera COI-5P                   | 88.8        |
| OTU_143;size=1082;        | Hymenoptera(33.3)        | GMBCC1926-15 Hymenoptera COI-5P                   | 91.1        |

|                          |                          |                                                |             |
|--------------------------|--------------------------|------------------------------------------------|-------------|
| OTU_145;size=1819;       | Hymenoptera(43.2)        | ASPNA1211-10 Formicidae COI-5P HQ550921        | 87.8        |
| OTU_1467;size=14;        | Hymenoptera(99.4)        | GBAHF076-13 Myrmica                            | 96.5        |
| OTU_1497;size=9;         | Hymenoptera(43.2)        | ASMAS039-08 Camponotus                         | 84.9        |
| OTU_1501;size=11;        | Hymenoptera(77.9)        | ASAM3185-05 Hymenoptera COI-5P                 | 86.6        |
| OTU_1540;size=13;        | Hymenoptera(61.8)        | ASPNA2314-11 Hymenoptera COI-5P                | 89.3        |
| OTU_1541;size=11;        | Hymenoptera(30.9)        | GMMGA466-14 Hymenoptera COI-5P                 | 85.8        |
| OTU_1543;size=9;         | Hymenoptera(28.8)        | ASLAM2054-12 Crematogaster                     | 81.5        |
| OTU_1557;size=14;        | Hymenoptera(49.8)        | ASPNA2217-11 Hymenoptera COI-5P                | 86.4        |
| OTU_1561;size=8;         | Hymenoptera(99.0)        | GMMGH414-14 Hymenoptera COI-5P                 | 91.9        |
| OTU_1563;size=8;         | Hymenoptera(88.1)        | GBAH11649-15 Nylanderia                        | 93          |
| OTU_1580;size=11;        | Hymenoptera(61.8)        | ASPNA1463-10 Formicidae COI-5P HQ551124        | 88.1        |
| OTU_1582;size=8;         | Hymenoptera(49.8)        | ASPNA1724-11 Formicidae COI-5P                 | 92.3        |
| OTU_1600;size=10;        | Hymenoptera(67.8)        | GBAH11701-15 Nylanderia                        | 100         |
| OTU_1601;size=10;        | Hymenoptera(83.2)        | MAHYM390-10 Hymenoptera COI-5P JF866256        | 86.8        |
| OTU_1610;size=8;         | Hymenoptera(99.9)        | GBAHF097-13 Polyrhachis                        | 100         |
| OTU_1618;size=8;         | Hymenoptera(49.8)        | ASANY702-10 Formicidae COI-5P HQ547426         | 82.4        |
| OTU_1629;size=8;         | Hymenoptera(49.8)        | ASANL126-10 Formicidae COI-5P                  | 86.4        |
| OTU_164;size=1214;       | Hymenoptera(61.8)        | ASPAL025-09 Hymenoptera COI-5P                 | 89.1        |
| OTU_1640;size=7;         | Hymenoptera(40.8)        | ASANI066-11 Formicidae COI-5P JN283519         | 80.6        |
| OTU_1643;size=7;         | Hymenoptera(96.6)        | GBAH11704-15 Nylanderia                        | 96.8        |
| OTU_1650;size=7;         | Hymenoptera(49.8)        | ASPNA1201-10 Formicidae COI-5P HQ550911        | 82.1        |
| OTU_1664;size=9;         | Hymenoptera(35.8)        | BCIFO1236-13 Hymenoptera COI-5P                | 81.9        |
| OTU_1667;size=14;        | Hymenoptera(99.2)        | GBAH2166-06 Odontoponera                       | 92.3        |
| OTU_1680;size=7;         | Hymenoptera(56.0)        | GBMIN25577-13 Hymenoptera COI-5P JQ345028      | 97.8        |
| OTU_1698;size=11;        | Hymenoptera(85.7)        | GBAHF115-13 Pseudolasius                       | 88.6        |
| <b>OTU_1703;size=7;*</b> | <b>Hymenoptera(60.0)</b> | <b>MAMOT462-10 Lepidoptera COI-5P HQ991154</b> | <b>78.4</b> |
| OTU_171;size=764;        | Hymenoptera(88.1)        | GBAH7030-10 Pachycondyla                       | 90.8        |
| OTU_1742;size=12;        | Hymenoptera(72.5)        | ASPAL025-09 Hymenoptera COI-5P                 | 90.3        |
| OTU_1749;size=11;        | Hymenoptera(99.7)        | GBAHF331-13 Dolichoderus                       | 100         |
| OTU_1751;size=7;         | Hymenoptera(61.8)        | FSA627-12 Hymenoptera COI-5P                   | 92.1        |
| OTU_1755;size=7;         | Hymenoptera(72.5)        | GMCRD114-13 Hymenoptera COI-5P                 | 89.3        |
| OTU_1762;size=7;         | Hymenoptera(80.6)        | GBAHF113-13 Cataglyphis COI-5P JQ681054        | 100         |
| OTU_1765;size=12;        | Hymenoptera(99.4)        | MAMTN340-13 Hymenoptera COI-5P                 | 88.8        |
| OTU_1789;size=6;         | Hymenoptera(51.9)        | AUSBC287-12 Hymenoptera COI-5P                 | 83.4        |
| OTU_1799;size=6;         | Hymenoptera(47.7)        | ASKBB059-14 Monomorium                         | 86.6        |
| OTU_1807;size=8;         | Hymenoptera(49.8)        | ASANJ1179-11 Hymenoptera COI-5P                | 84.1        |
| OTU_1808;size=8;         | Hymenoptera(99.2)        | GBAHF076-13 Myrmica                            | 95.5        |
| OTU_1816;size=8;         | Hymenoptera(63.7)        | GBMIN25144-13 Hymenoptera COI-5P JQ345027      | 91.9        |
| OTU_1834;size=19;        | Hymenoptera(98.4)        | MAHYM468-10 Hymenoptera COI-5P JF866317        | 88.8        |
| OTU_1839;size=6;         | Hymenoptera(61.8)        | NZHYM361-10 Formicidae COI-5P JN283828         | 93.8        |
| OTU_1843;size=6;         | Hymenoptera(65.7)        | ASPNA1308-10 Formicidae COI-5P HQ551004        | 90.1        |
| OTU_1849;size=8;         | Hymenoptera(57.9)        | GMBCD243-15 Hymenoptera COI-5P                 | 92.6        |
| OTU_1873;size=6;         | Hymenoptera(57.9)        | GMMGD2127-14 Hymenoptera COI-5P                | 92.2        |

|                   |                   |                                            |      |
|-------------------|-------------------|--------------------------------------------|------|
| OTU_189;size=588; | Hymenoptera(77.9) | ASANA565-06 Hymenoptera COI-5P             | 87.8 |
| OTU_1897;size=6;  | Hymenoptera(63.7) | AUSCL1225-12 Hymenoptera COI-5P            | 82.9 |
| OTU_19;size=6009; | Hymenoptera(53.9) | ASPNA738-09 Formicidae COI-5P HM435142     | 88.6 |
| OTU_190;size=801; | Hymenoptera(49.8) | GMBCC2372-15 Hymenoptera COI-5P            | 93.9 |
| OTU_1905;size=13; | Hymenoptera(60.0) | GBAH2167-06 Technomyrmex                   | 84.1 |
| OTU_191;size=474; | Hymenoptera(98.6) | GMMGT031-14 Hymenoptera COI-5P             | 97.3 |
| OTU_1922;size=6;  | Hymenoptera(56.0) | ASPNA1797-11 Formicidae COI-5P             | 89.6 |
| OTU_1925;size=8;  | Hymenoptera(99.3) | GBAHF071-13 Tetraponera                    | 93.3 |
| OTU_1931;size=5;  | Hymenoptera(43.2) | GBMIN10137-12 Solenopsis                   | 81.6 |
| OTU_1941;size=5;  | Hymenoptera(70.2) | ASPNA1324-10 Formicidae COI-5P HQ551019    | 89.3 |
| OTU_1948;size=21; | Hymenoptera(53.9) | FSA1138-12 Hymenoptera COI-5P              | 88.3 |
| OTU_1969;size=5;  | Hymenoptera(93.5) | ASAC049-07 Hymenoptera COI-5P              | 84.8 |
| OTU_20;size=5900; | Hymenoptera(98.4) | GBAH7014-10 Pachycondyla                   | 91.1 |
| OTU_2004;size=5;  | Hymenoptera(53.9) | FSA627-12 Hymenoptera COI-5P               | 88.8 |
| OTU_2013;size=9;  | Hymenoptera(57.9) | ASPNA712-09 Formicidae COI-5P HM435131     | 90.1 |
| OTU_2026;size=5;  | Hymenoptera(99.4) | GBAHF101-13 Polyrhachis                    | 96   |
| OTU_2027;size=5;  | Hymenoptera(99.8) | WOMIC281-10 Microgastrinae COI-5P JN282285 | 100  |
| OTU_205;size=505; | Hymenoptera(85.7) | GBAH11704-15 Nylanderia                    | 100  |
| OTU_208;size=552; | Hymenoptera(63.7) | ASPNA409-09 Formicidae COI-5P HM373292     | 88.1 |
| OTU_209;size=444; | Hymenoptera(80.6) | ASANE557-10 Formicidae COI-5P JN287619     | 89.3 |
| OTU_2092;size=5;  | Hymenoptera(51.9) | NZHYM2059-13 Hymenoptera COI-5P            | 91.1 |
| OTU_2128;size=6;  | Hymenoptera(40.8) | FSA298-12 Hymenoptera COI-5P               | 86.6 |
| OTU_2134;size=7;  | Hymenoptera(99.3) | ASPNA2660-12 Hymenoptera COI-5P            | 98.3 |
| OTU_2152;size=10; | Hymenoptera(65.7) | JDWAM811-05 Anochetus                      | 85.9 |
| OTU_2188;size=10; | Hymenoptera(53.9) | GBAH2167-06 Technomyrmex                   | 82.6 |
| OTU_2210;size=4;  | Hymenoptera(72.5) | ASPNA1097-10 Formicidae COI-5P HQ550826    | 85.9 |
| OTU_224;size=838; | Hymenoptera(60.0) | ASANR249-09 Formicidae COI-5P GU711346     | 86.4 |
| OTU_2262;size=8;  | Hymenoptera(97.2) | ASPNA1330-10 Formicidae COI-5P HQ551024    | 92.3 |
| OTU_2266;size=4;  | Hymenoptera(61.8) | ASANR282-09 Formicidae COI-5P HM373190     | 85.4 |
| OTU_2272;size=9;  | Hymenoptera(88.1) | GBAHF327-13 Tapinoma                       | 88.6 |
| OTU_2284;size=4;  | Hymenoptera(57.9) | GMBCC2372-15 Hymenoptera COI-5P            | 93.6 |
| OTU_2304;size=4;  | Hymenoptera(99.6) | ASMA392-05 Technomyrmex                    | 98.8 |
| OTU_2305;size=4;  | Hymenoptera(49.8) | ASLAM2180-12 Pheidole                      | 79.9 |
| OTU_2307;size=4;  | Hymenoptera(56.0) | ASPNA2718-12 Hymenoptera COI-5P            | 84.9 |
| OTU_2311;size=8;  | Hymenoptera(51.9) | ASPNA2562-12 Hymenoptera COI-5P            | 80.6 |
| OTU_2319;size=6;  | Hymenoptera(53.9) | ASPNA1366-10 Formicidae COI-5P HQ551053    | 87.1 |
| OTU_2322;size=6;  | Hymenoptera(99.5) | CNCHW845-09 Microgastrinae COI-5P HM430642 | 100  |
| OTU_2350;size=4;  | Hymenoptera(98.8) | GBAHF076-13 Myrmica                        | 91.3 |
| OTU_2362;size=8;  | Hymenoptera(70.2) | ICHF11172-12 Hymenoptera COI-5P            | 88.1 |
| OTU_2366;size=4;  | Hymenoptera(93.5) | ASMA1175-05 Pheidole                       | 88.8 |
| OTU_2374;size=4;  | Hymenoptera(75.1) | ASANL376-10 Formicidae COI-5P HQ547206     | 87.8 |
| OTU_2384;size=3;  | Hymenoptera(98.8) | MAMTS101-14 Hymenoptera COI-5P             | 97   |
| OTU_2389;size=3;  | Hymenoptera(70.2) | ASPNA536-09 Formicidae COI-5P HM373328     | 88.6 |

|                          |                          |                                                     |             |
|--------------------------|--------------------------|-----------------------------------------------------|-------------|
| OTU_2392;size=3;         | Hymenoptera(90.2)        | ASPNA556-09 Formicidae COI-5P HM435079              | 88.6        |
| OTU_2404;size=5;         | Hymenoptera(51.9)        | GMSAV1814-13 Hymenoptera COI-5P                     | 82.4        |
| OTU_2430;size=3;         | Hymenoptera(51.9)        | GBMIN26719-13 Aphaenogaster                         | 85.4        |
| OTU_2511;size=3;         | Hymenoptera(49.8)        | BBHYA3111-12 Hymenoptera COI-5P                     | 83.6        |
| OTU_252;size=365;        | Hymenoptera(53.9)        | ASPAL025-09 Hymenoptera COI-5P                      | 92.6        |
| OTU_253;size=562;        | Hymenoptera(61.8)        | GBAHF076-13 Myrmica                                 | 99.5        |
| OTU_2536;size=3;         | Hymenoptera(99.6)        | CNPPI204-12 Aprostocetus COI-5P KJ208035            | 88.4        |
| <b>OTU_2567;size=3;*</b> | <b>Hymenoptera(72.5)</b> | <b>HCNC039-09 Cymus</b>                             | <b>80.6</b> |
| <b>OTU_2573;size=3;*</b> | <b>Hymenoptera(57.9)</b> | <b>COLLE348-09 Entomobryomorpha COI-5P HM397720</b> | <b>81.4</b> |
| OTU_2604;size=5;         | Hymenoptera(28.8)        | GMCHP007-14 Hymenoptera COI-5P                      | 93.4        |
| OTU_2612;size=3;         | Hymenoptera(60.0)        | MAHYM468-10 Hymenoptera COI-5P JF866317             | 91.6        |
| OTU_2627;size=3;         | Hymenoptera(98.8)        | ASPNA1482-10 Hymenoptera COI-5P                     | 88.6        |
| OTU_2650;size=5;         | Hymenoptera(47.7)        | ASANZ114-10 Formicidae COI-5P HQ547537              | 82.9        |
| OTU_267;size=359;        | Hymenoptera(40.8)        | ASPNA2849-12 Hymenoptera COI-5P                     | 85.1        |
| OTU_2696;size=3;         | Hymenoptera(47.7)        | GBAHF101-13 Polyrhachis                             | 92.3        |
| OTU_270;size=371;        | Hymenoptera(99.1)        | GBMIN25372-13 Hymenoptera COI-5P JQ344567           | 100         |
| OTU_2700;size=3;         | Hymenoptera(99.5)        | ASANG655-10 Hymenoptera COI-5P                      | 81.1        |
| OTU_2729;size=3;         | Hymenoptera(38.4)        | GBAH11640-15 Nylanderia                             | 88.5        |
| OTU_2738;size=5;         | Hymenoptera(72.5)        | ASPAL025-09 Hymenoptera COI-5P                      | 85.9        |
| OTU_2761;size=287;       | Hymenoptera(88.1)        | GBMIN25578-13 Hymenoptera COI-5P JQ345026           | 89.7        |
| OTU_2858;size=2;         | Hymenoptera(77.9)        | ASANY176-10 Formicidae COI-5P HQ547326              | 84.9        |
| OTU_293;size=497;        | Hymenoptera(70.2)        | GMCHE014-14 Hymenoptera COI-5P                      | 96.4        |
| OTU_2934;size=2;         | Hymenoptera(92.1)        | SSBAF5460-13 Eulophidae COI-5P KR874027             | 90.3        |
| OTU_2971;size=2;         | Hymenoptera(77.9)        | GBAH2167-06 Technomyrmex                            | 83.9        |
| <b>OTU_2986;size=2;*</b> | <b>Hymenoptera(60.0)</b> | <b>MYFAB432-11 Lithobiomorpha COI-5P JN306635</b>   | <b>76</b>   |
| OTU_3;size=16375;        | Hymenoptera(21.5)        | GBAH2166-06 Odontoponera                            | 92.3        |
| OTU_3015;size=2;         | Hymenoptera(99.2)        | GBAHF084-13 Camponotus                              | 100         |
| <b>OTU_3017;size=2;*</b> | <b>Hymenoptera(99.8)</b> | <b>LNOUB700-10 Lepidoptera COI-5P HQ988948</b>      | <b>77.4</b> |
| OTU_304;size=233;        | Hymenoptera(43.2)        | GMBCD243-15 Hymenoptera COI-5P                      | 94.4        |
| OTU_3040;size=2;         | Hymenoptera(90.2)        | ASPNA2424-12 Hymenoptera COI-5P                     | 83.6        |
| OTU_3053;size=2;         | Hymenoptera(47.7)        | ASPNA1451-10 Hymenoptera COI-5P                     | 99.3        |
| OTU_307;size=1389;       | Hymenoptera(53.9)        | GBAH6996-10 Pachycondyla                            | 91.1        |
| OTU_3084;size=2;         | Hymenoptera(94.8)        | ASPNA2083-11 Formicidae COI-5P                      | 88.1        |
| OTU_3089;size=2;         | Hymenoptera(45.5)        | ASPNA2283-11 Hymenoptera COI-5P                     | 89.3        |
| OTU_3099;size=2;         | Hymenoptera(63.7)        | ASANG664-10 Formicidae COI-5P JF862924              | 90.6        |
| OTU_3100;size=2;         | Hymenoptera(92.1)        | PHFLO124-10 Hymenoptera COI-5P JN307266             | 86.1        |
| OTU_3104;size=2;         | Hymenoptera(60.0)        | ASAMF130-06 Hymenoptera COI-5P                      | 98.5        |
| OTU_3114;size=2;         | Hymenoptera(99.4)        | ASSPQ024-08 Baryscapus                              | 92.4        |
| OTU_3122;size=2;         | Hymenoptera(98.6)        | ASANX177-10 Formicidae COI-5P HM880834              | 84.4        |
| OTU_318;size=677;        | Hymenoptera(53.9)        | GMBCD243-15 Hymenoptera COI-5P                      | 92.3        |
| OTU_3181;size=2;         | Hymenoptera(92.1)        | GMBCC2372-15 Hymenoptera COI-5P                     | 94.8        |
| OTU_3185;size=2;         | Hymenoptera(60.0)        | ASANJ593-11 Formicidae COI-5P                       | 83.4        |
| OTU_3189;size=2;         | Hymenoptera(61.8)        | MAMTN097-13 Hymenoptera COI-5P                      | 86.4        |

|                          |                          |                                           |             |
|--------------------------|--------------------------|-------------------------------------------|-------------|
| OTU_3192;size=2;         | Hymenoptera(40.8)        | GMBCC2372-15 Hymenoptera COI-5P           | 92.1        |
| OTU_3203;size=2;         | Hymenoptera(45.5)        | CNCHW731-09 Apanteles COI-5P HM430546     | 95.3        |
| OTU_3237;size=2;         | Hymenoptera(99.3)        | ASANI781-11 Hymenoptera COI-5P            | 84.4        |
| OTU_3286;size=2;         | Hymenoptera(60.0)        | ASPAL025-09 Hymenoptera COI-5P            | 92.6        |
| OTU_3298;size=2;         | Hymenoptera(57.9)        | INAOB012-12 Aphaenogaster                 | 80.1        |
| OTU_3300;size=2;         | Hymenoptera(57.9)        | MAHYM391-10 Hymenoptera COI-5P            | 89.7        |
| OTU_3309;size=2;         | Hymenoptera(67.8)        | ASANS508-10 Formicidae COI-5P HM418723    | 84.6        |
| OTU_3320;size=2;         | Hymenoptera(47.7)        | CNGRL255-13 Encyrtidae COI-5P KR789888    | 87.2        |
| OTU_3332;size=2;         | Hymenoptera(61.8)        | ASPNA2242-11 Hymenoptera COI-5P           | 85.6        |
| OTU_3344;size=2;         | Hymenoptera(40.8)        | CNSLS095-13 Spathius COI-5P KR797084      | 91.3        |
| OTU_335;size=199;        | Hymenoptera(72.5)        | FSA1049-12 Hymenoptera COI-5P             | 85.9        |
| OTU_3377;size=2;         | Hymenoptera(56.0)        | ASPNA409-09 Formicidae COI-5P HM373292    | 89.1        |
| OTU_3378;size=2;         | Hymenoptera(60.0)        | INAOB016-12 Aphaenogaster                 | 76.7        |
| OTU_3421;size=2;         | Hymenoptera(33.3)        | ETK026-11 Formicidae COI-5P               | 85.9        |
| OTU_3436;size=2;         | Hymenoptera(61.8)        | ASANO837-09 Pheidole                      | 85.9        |
| OTU_3450;size=2;         | Hymenoptera(80.6)        | GMMGT2846-14 Hymenoptera COI-5P           | 85.4        |
| OTU_3488;size=2;         | Hymenoptera(28.8)        | BCHYM4407-14 Hymenoptera COI-5P           | 90.6        |
| OTU_3512;size=2;         | Hymenoptera(80.6)        | HYCNI1541-12 Hymenoptera COI-5P           | 87.4        |
| OTU_3521;size=2;         | Hymenoptera(61.8)        | GBAH5515-09 Messor                        | 85.1        |
| OTU_3545;size=2;         | Hymenoptera(51.9)        | GBAHF077-13 Cerapachys                    | 87.1        |
| OTU_355;size=227;        | Hymenoptera(63.7)        | GMCHP006-14 Hymenoptera COI-5P            | 90          |
| OTU_3558;size=2;         | Hymenoptera(63.7)        | GBAHF075-13 Paraparatrechina              | 90.6        |
| OTU_356;size=199;        | Hymenoptera(90.2)        | GBAHF075-13 Paraparatrechina              | 99.3        |
| <b>OTU_3567;size=4;*</b> | <b>Hymenoptera(99.6)</b> | <b>GBMIN26777-13 Orius</b>                | <b>84.4</b> |
| OTU_3577;size=2;         | Hymenoptera(56.0)        | GBAH6996-10 Pachycondyla                  | 87.8        |
| OTU_3581;size=2;         | Hymenoptera(70.2)        | GBAHF077-13 Cerapachys                    | 86.8        |
| OTU_3586;size=2;         | Hymenoptera(57.9)        | GMCHP006-14 Hymenoptera COI-5P            | 91.5        |
| OTU_3589;size=2;         | Hymenoptera(72.5)        | ASPNA2161-11 Formicidae COI-5P            | 84.9        |
| OTU_3593;size=2;         | Hymenoptera(47.7)        | GBAHF325-13 Technomyrmex                  | 90.8        |
| OTU_3612;size=2;         | Hymenoptera(94.8)        | GMCHP006-14 Hymenoptera COI-5P            | 92.4        |
| OTU_364;size=255;        | Hymenoptera(94.8)        | GMBCC2372-15 Hymenoptera COI-5P           | 89.6        |
| OTU_368;size=194;        | Hymenoptera(51.9)        | GMCHE014-14 Hymenoptera COI-5P            | 95.5        |
| OTU_375;size=159;        | Hymenoptera(92.1)        | GBAHF332-13 Dolichoderus                  | 88.8        |
| OTU_381;size=149;        | Hymenoptera(98.0)        | GBMIN25578-13 Hymenoptera COI-5P JQ345026 | 90.3        |
| OTU_398;size=220;        | Hymenoptera(57.9)        | GMMGN1711-14 Hymenoptera COI-5P           | 88.4        |
| OTU_399;size=210;        | Hymenoptera(63.7)        | GMMGS722-14 Hymenoptera COI-5P            | 91          |
| OTU_405;size=129;        | Hymenoptera(80.6)        | GBAHF332-13 Dolichoderus                  | 85.1        |
| OTU_411;size=285;        | Hymenoptera(51.9)        | GBAH11702-15 Nylanderia                   | 99.8        |
| OTU_421;size=121;        | Hymenoptera(67.8)        | ASPAL025-09 Hymenoptera COI-5P            | 90.3        |
| OTU_428;size=112;        | Hymenoptera(80.6)        | NOFOR028-13 Hymenoptera COI-5P            | 84.9        |
| OTU_445;size=153;        | Hymenoptera(33.3)        | ASPAL025-09 Hymenoptera COI-5P            | 89.6        |
| OTU_455;size=96;         | Hymenoptera(65.7)        | ASPAN281-10 Formicidae COI-5P JF863830    | 83.6        |
| OTU_457;size=92;         | Hymenoptera(80.6)        | GMBCD243-15 Hymenoptera COI-5P            | 94.1        |

|                          |                          |                                           |           |
|--------------------------|--------------------------|-------------------------------------------|-----------|
| OTU_46;size=2956;        | Hymenoptera(77.9)        | GBAH6998-10 Pachycondyla                  | 90.6      |
| OTU_462;size=266;        | Hymenoptera(98.0)        | ASPNA1084-10 Formicidae COI-5P HQ550817   | 83.4      |
| OTU_466;size=108;        | Hymenoptera(38.4)        | BASYM1197-11 Hymenoptera COI-5P KC972652  | 79.2      |
| OTU_469;size=171;        | Hymenoptera(57.9)        | GMNZE548-14 Hymenoptera COI-5P            | 92.1      |
| OTU_475;size=122;        | Hymenoptera(94.8)        | MGABB398-10 Formicidae COI-5P HM893002    | 91.1      |
| OTU_477;size=138;        | Hymenoptera(98.0)        | GBAH0134-06 Oecophylla                    | 100       |
| OTU_478;size=230;        | Hymenoptera(99.9)        | ASANI350-11 Formicidae COI-5P             | 84.9      |
| <b>OTU_479;size=89;*</b> | <b>Hymenoptera(47.7)</b> | <b>GBDP4990-08 Zaprius</b>                | <b>97</b> |
| OTU_48;size=3686;        | Hymenoptera(60.0)        | ASPAL025-09 Hymenoptera COI-5P            | 89.3      |
| OTU_494;size=160;        | Hymenoptera(90.2)        | GBAH11704-15 Nylanderia                   | 94        |
| OTU_5;size=17242;        | Hymenoptera(33.3)        | GMMGO010-14 Hymenoptera COI-5P            | 88.6      |
| OTU_505;size=105;        | Hymenoptera(72.5)        | ASPNA1482-10 Hymenoptera COI-5P           | 89.3      |
| OTU_518;size=111;        | Hymenoptera(92.1)        | MAHYM468-10 Hymenoptera COI-5P JF866317   | 89.3      |
| OTU_53;size=4237;        | Hymenoptera(98.2)        | GBAH6996-10 Pachycondyla                  | 91.6      |
| OTU_551;size=72;         | Hymenoptera(99.3)        | ASANX117-10 Formicidae COI-5P HM419386    | 86.6      |
| OTU_554;size=91;         | Hymenoptera(51.9)        | GBAH5187-09 Neodiprion                    | 81.5      |
| OTU_565;size=62;         | Hymenoptera(51.9)        | ASLAM479-11 Pachycondyla                  | 82.6      |
| OTU_599;size=57;         | Hymenoptera(63.7)        | ASANY108-10 Hymenoptera COI-5P            | 87.6      |
| OTU_603;size=63;         | Hymenoptera(80.6)        | GMBCF3807-15 Hymenoptera COI-5P           | 89.3      |
| OTU_61;size=2745;        | Hymenoptera(99.1)        | GBAH7010-10 Pachycondyla                  | 91.8      |
| OTU_637;size=54;         | Hymenoptera(51.9)        | GBMIN26678-13 Camponotus                  | 82.9      |
| OTU_66;size=2071;        | Hymenoptera(94.8)        | ASANA493-06 Hymenoptera COI-5P            | 90.8      |
| OTU_684;size=54;         | Hymenoptera(60.0)        | GBMIN11072-12 Nylanderia                  | 78.2      |
| OTU_685;size=46;         | Hymenoptera(67.8)        | GBAHF117-13 Anoplolepis COI-5P JQ681050   | 98.5      |
| OTU_693;size=54;         | Hymenoptera(35.8)        | ASANQ417-09 Formicidae COI-5P GU711066    | 78.7      |
| OTU_694;size=40;         | Hymenoptera(88.1)        | GBAHF327-13 Tapinoma                      | 89.8      |
| OTU_707;size=44;         | Hymenoptera(51.9)        | GBAH11583-15 Monomorium                   | 82.9      |
| OTU_73;size=2042;        | Hymenoptera(61.8)        | GMCHP006-14 Hymenoptera COI-5P            | 91.2      |
| OTU_740;size=55;         | Hymenoptera(47.7)        | FSA184-11 Formicidae COI-5P               | 85.1      |
| OTU_750;size=45;         | Hymenoptera(60.0)        | ASANY511-10 Formicidae COI-5P KF200838    | 85.9      |
| OTU_758;size=40;         | Hymenoptera(99.4)        | ASPAL044-09 Hymenoptera COI-5P            | 97.5      |
| OTU_769;size=34;         | Hymenoptera(47.7)        | GBAH11542-15 Monomorium                   | 84.6      |
| OTU_773;size=31;         | Hymenoptera(75.1)        | ICHFI295-12 Hymenoptera COI-5P            | 84.6      |
| OTU_779;size=40;         | Hymenoptera(45.5)        | ASPNA516-09 Formicidae COI-5P HM373323    | 86.1      |
| OTU_8;size=10162;        | Hymenoptera(99.2)        | GBAHF327-13 Tapinoma                      | 93.5      |
| OTU_805;size=31;         | Hymenoptera(98.8)        | ASPNA741-09 Formicidae COI-5P HQ927082    | 97.3      |
| OTU_807;size=32;         | Hymenoptera(63.7)        | FSA1848-13 Hymenoptera COI-5P             | 89.1      |
| OTU_822;size=69;         | Hymenoptera(98.0)        | ASANA717-06 Hymenoptera COI-5P            | 84.6      |
| OTU_835;size=39;         | Hymenoptera(80.6)        | ASLAM140-08 Pheidole                      | 86.8      |
| OTU_841;size=26;         | Hymenoptera(35.8)        | GBMIN25809-13 Hymenoptera COI-5P JQ344560 | 100       |
| OTU_844;size=26;         | Hymenoptera(99.7)        | GBAHF325-13 Technomyrmex                  | 100       |
| OTU_86;size=2421;        | Hymenoptera(98.7)        | GBAH6996-10 Pachycondyla                  | 90.6      |
| OTU_864;size=25;         | Hymenoptera(98.0)        | GMMGD269-14 Hymenoptera COI-5P            | 92.8      |



|                   |                   |                                        |      |
|-------------------|-------------------|----------------------------------------|------|
| OTU_877;size=31;  | Hymenoptera(98.8) | GBAH6996-10 Pachycondyla               | 92.1 |
| OTU_88;size=1656; | Hymenoptera(72.5) | ASANY107-10 Formicidae COI-5P HQ547310 | 87.1 |
| OTU_89;size=3148; | Hymenoptera(63.7) | GMCHP006-14 Hymenoptera COI-5P         | 89.7 |
| OTU_934;size=21;  | Hymenoptera(97.2) | GBAH7019-10 Pachycondyla               | 90.6 |
| OTU_935;size=21;  | Hymenoptera(60.0) | ASPNA2402-12 Hymenoptera COI-5P        | 87.6 |
| OTU_949;size=21;  | Hymenoptera(35.8) | KHYME5150-13 Hymenoptera COI-5P        | 78.5 |
| OTU_957;size=41;  | Hymenoptera(47.7) | MAMTD487-12 Hymenoptera COI-5P         | 84.1 |
| OTU_960;size=21;  | Hymenoptera(98.9) | GBAHF102-13 Polyrhachis                | 94   |
| OTU_976;size=52;  | Hymenoptera(63.7) | ASPNA738-09 Formicidae COI-5P HM435142 | 89.7 |
| OTU_98;size=2148; | Hymenoptera(98.2) | GBAHF336-13 Dolichoderus               | 90.6 |
| OTU_984;size=38;  | Hymenoptera(63.7) | ASPNA738-09 Formicidae COI-5P HM435142 | 89.9 |
| OTU_990;size=22;  | Hymenoptera(72.5) | GBAHF439-14 Pheidole                   | 87.8 |

**Table S5** MOTU richness differences between mono- and polyculture tea, and between terraced and unterraced tea for all MOTUs combined and MOTUs coarsely identified to Orders. Differences are based on Kruskal-Wallis rank sum test and Mann-Whitney U test with bonferroni correction.

| MOTUs       | X <sup>2</sup> | P    | Pairwise comparisons | Z      | P     |
|-------------|----------------|------|----------------------|--------|-------|
| All         | 2.122          | 0.15 | Poly-/Monoculture    | 1.456  | 0.072 |
|             | 0.011          | 0.92 | Terraced/Unterraced  | -0.106 | 0.457 |
| Arachnida   | 0.592          | 0.44 | Poly-/Monoculture    | 0.76   | 0.220 |
|             | 0.581          | 0.45 | Terraced/Unterraced  | 0.762  | 0.222 |
| Blattodea   | 0.007          | 0.93 | Poly-/Monoculture    | 0.088  | 0.464 |
|             | 1.247          | 0.26 | Terraced/Unterraced  | 1.116  | 0.132 |
| Coleoptera  | 2.674          | 0.1  | Poly-/Monoculture    | 1.635  | 0.051 |
|             | 1.130          | 0.29 | Terraced/Unterraced  | -1.063 | 0.143 |
| Diptera     | 1.425          | 0.23 | Poly-/Monoculture    | 1.193  | 0.116 |
|             | 0.045          | 0.83 | Terraced/Unterraced  | 0.212  | 0.415 |
| Hemiptera   | 3.649          | 0.06 | Poly-/Monoculture    | 1.910  | 0.028 |
|             | 1.929          | 0.16 | Terraced/Unterraced  | -1.389 | 0.082 |
| Hymenoptera | 3.287          | 0.07 | Poly-/Monoculture    | 1.813  | 0.034 |
|             | 0.138          | 0.71 | Terraced/Unterraced  | -0.372 | 0.354 |
| Chilopoda   | 1.706          | 0.19 | Poly-/Monoculture    | 1.306  | 0.095 |
|             | 0.660          | 0.42 | Terraced/Unterraced  | -0.812 | 0.208 |
| Orthoptera  | 0.017          | 0.89 | Poly-/Monoculture    | 0.132  | 0.447 |
|             | 1.131          | 0.29 | Terraced/Unterraced  | -1.063 | 0.143 |

**Table S6** Taxonomic identification levels for eight arthropod groups

|             | No. of MOTUs | % identified to |       |        |       |
|-------------|--------------|-----------------|-------|--------|-------|
|             |              | Class           | Order | Family | Genus |
| Blattodea   | 319          | -               | 75.9  | -      | 24.1  |
| Coleoptera  | 731          |                 | 52.4  | 2.1    | 45.5  |
| Diptera     | 517          |                 | 52.6  | 5.6    | 41.8  |
| Hemiptera   | 246          |                 | 63.8  | 2.1    | 34.1  |
| Hymenoptera | 294          |                 | 46.9  | 24.8   | 28.2  |
| Orthoptera  | 227          | -               | 35.7  | -      | 64.3  |
| Arachnida   | 88           | 5.7             | 62.5  | 10.2   | 21.6  |
| Chilopoda   | 147          | 1.4             | 45.6  | 1.4    | 51.7  |

## Land use types and characteristics

1. *Native vegetation (henceforth Forest)*: The tropical vegetation of XSBN is classified into four forest types; tropical seasonal rainforests, tropical montane rainforests, tropical seasonal moist forests and tropical montane evergreen broad-leaf forests [1]. These forest types differ from each other in terms of spatial distribution, elevation, species diversity, physiognomy, vegetation structure and composition [1].
2. *Rubber plantations (henceforth Rubber)*: The most substantial land use change in XSBN is the conversion of native forests to rubber. Forests (mostly below 900 m a.s.l.) are clear-cut and burnt. Terraces (~ 1 m high and ~ 2.5 m wide) are cut into the ground and young rubber seedlings are planted on the terraces [2]. Management also includes understory cover control using herbicides or manual cutting, application of synthetic fertilizers (Nitrogen-Phosphorus-Potassium [N-P-K] complex), pest control and latex collection [2]. All these, except latex collection, take place once or twice a year and constitute ecosystem disturbance. Latex is collected every second day between March /April and October / November each year.
3. *Tea plantations (henceforth Tea)*: Unlike rubber where terrace benches are always constructed, tea is sometimes planted in the forest understory or together with other trees and/or crops [3]. Until recently, only large-scale commercial tea production used 'contour planting', where tea bushes are planted in lines along elevational isoclines, usually on clear-cut slopes. Pesticide and fertilizer use are a common practice in most tea plantations.

## Land use change and environment variables

To evaluate the factors determining arthropod richness, rarity and composition patterns within natural and human-modified habitats, we assessed land use and environmental variables as follows:

1. Habitat: categorized into three types ordered according to disturbance level (e.g. forest [0], tea [1] and rubber [2]).
2. Canopy openness: extracted from nine hemispheric (true-color fisheye) photographs taken at each site, with canopy openness determined from the photographs using the Gap Light Analyzer (GLA) version 2.0 software [4], and averaged.
3. Leaf litter thickness: measured with a ruler at three points within each of the nine sampling quadrats (27 measurements per site) and averaged
4. Leaf litter quality: Total Carbon (TC), total Nitrogen (TN), total Phosphorus (TP), total Potassium (TK), tannin content, coarse fiber content and (acid-digestible) lignin content were analyzed from composite leaf litter samples of each site at the Xishuangbanna Tropical Botanical Garden (XTBG) Biogeochemistry Laboratory. TC and TN concentrations (g/Kg) were determined using the vario Max CN Elemental Analyzer (elementar Analysensysteme GmbH, Germany). TP and TK concentrations (g/Kg) were determined using the ICP-AES (iCAP 6300, Thermo Fisher Scientific Inc, USA) method. Tannin (%) and lignin contents (%) were determined using a UV-Visible Spectrophotometer (UV-2450, Shimadzu, Japan). Coarse fiber content (%) was determined using the automated fibertec method (Fibertec<sup>TM</sup> 2010, Foss Analytical; Denmark).

5. Environment: elevation recorded with a hand-held GPS (GPSMAP® 62s | Garmin); slope measurements were taken at three of the quadrats for each site with a clinometer (Suunto Clinometer 802575) and averaged; topography, a factor with three levels as valley (lower quarter of a hillside =0), slope (the intermediate slope positions =1), and ridge (upper quarter of a hillside =2).

## References

1. Zhu, H., Cao, M. and Hu, H. (2006), Geological History, Flora, and Vegetation of Xishuangbanna, Southern Yunnan, China. *Biotropica*, 38: 310–317. doi: 10.1111/j.1744-7429.2006.00147.x
2. de Blécourt M, Brumme R, Xu J, Corre MD, Veldkamp E (2013). Soil Carbon Stocks Decrease following Conversion of Secondary Forests to Rubber (*Hevea brasiliensis*) Plantations. *PLoS ONE* 8(7): e69357. doi:10.1371/journal.pone.0069357
3. Liu SJ, Li JP, Sui Y, Schaefer DA, Alele PO, Chen J, Yang XD (2015) Spider foraging strategies dominate pest suppression in organic tea plantations. *Biol Control* doi: 10.1007/s10526-015-9691-2
4. Frazer, G.W., Canham, C.D., and Lertzman, K.P. (1999). Gap Light Analyzer (GLA), Version 2.0: Imaging software to extract canopy structure and gap light transmission indices from true-color fisheye photographs, user's manual and program documentation. Copyright © 1999: Simon Fraser University, Burnaby, British Columbia, and the Institute of Ecosystem Studies, Millbrook, New York.
